# Supplementary material for: Interaction of O2 with Reduced Ceria Nanoparticles at 100–400 K: Fast Oxidation of Ce3+ Ions and Dissolved H2
Source: MDPI journal article supplement (doi:10.3390/catal14010045), 2024-01-09
Supplement: s1 [file s1]

Archive with 1 entries (1 files):
- catalysts-2767292-supplementary.pdf
