# Supplementary material for: Interaction of O2 with Reduced Ceria Nanoparticles at 100–400 K: Fast Oxidation of Ce3+ Ions and Dissolved H2
Source: MDPI journal article supplement (doi:10.3390/catal14010045), 2024-01-09
Supplement: s1 [file s1 › catalysts-2767292-supplementary.pdf]

# Interaction of O<sub>2</sub> with reduced ceria nanoparticles at 100–400 K: Fast oxidation of Ce<sup>3+</sup> ions and dissolved H<sub>2</sub>

Kristina Chakarova, Nikola Drenchev, Mihail Mihaylov and Konstantin Hadjiivanov

## SUPPORTING INFORMATION

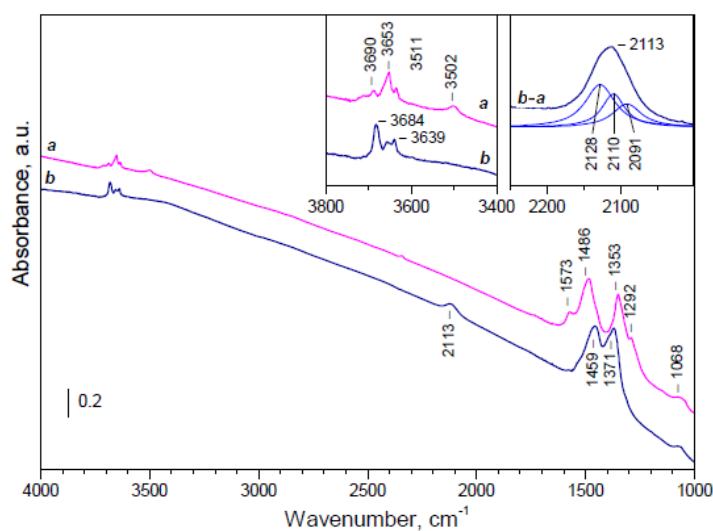

**Figure S1.** FTIR spectra of CeO<sub>2</sub>-NR after activation (a) and reduction (b) at 773 K.

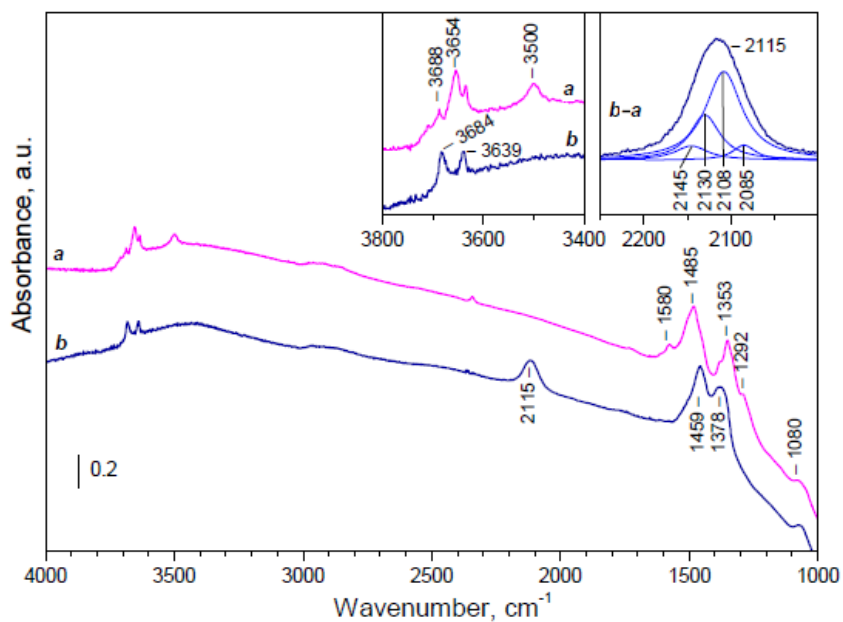

**Figure S2.** FTIR spectra of CeO<sub>2</sub>-NP after activation (a) and reduction (b) at 773 K.

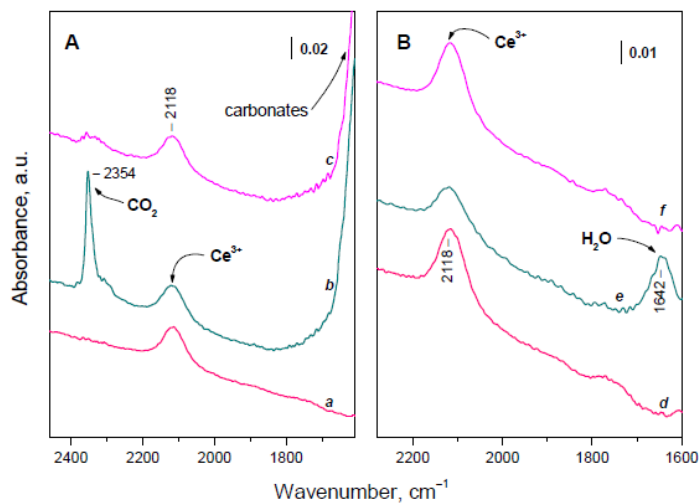

**Figure S3.** A. FTIR spectra of reduced  $\text{CeO}_2\text{-NR}$  (a), in the presence of 2 mbar  $\text{CO}_2$  (b) and after evacuation at ambient temperature (c). B. FTIR spectra of reduced  $\text{CeO}_2\text{-NR}$  (a), in the presence of 2 mbar  $\text{H}_2\text{O}$  (b) and after evacuation at 773 K (c).

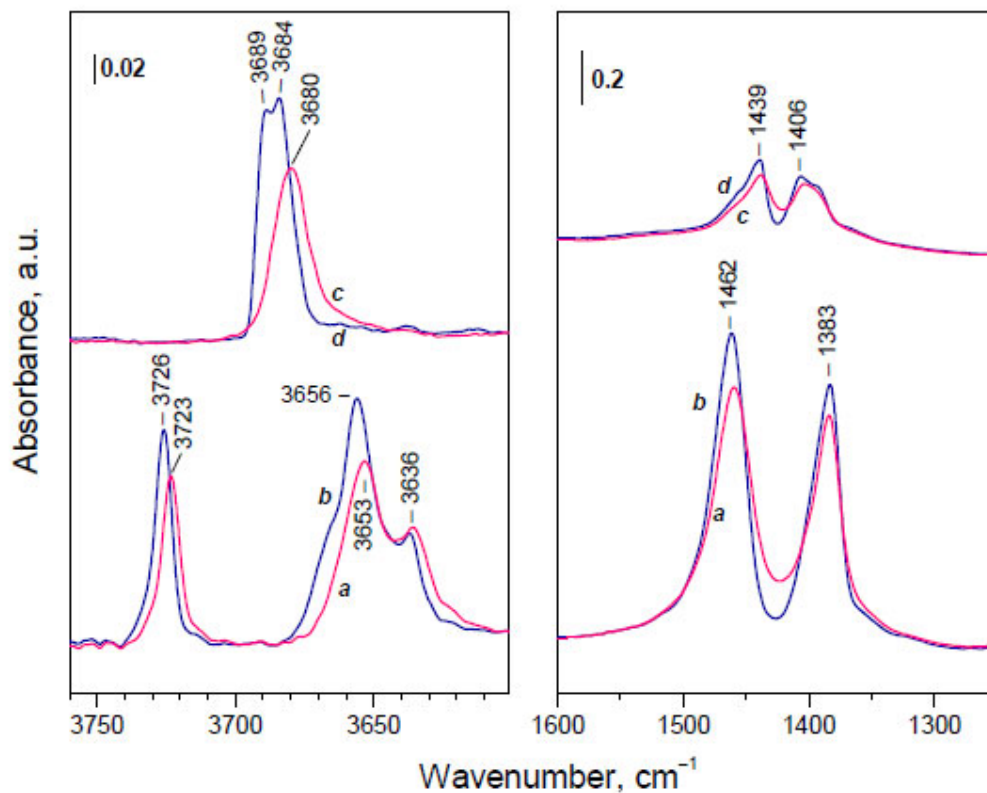

**Figure S4.** FTIR spectra of activated (a, b) and reduced  $\text{CeO}_2\text{-NP}$  (c, d). Spectra registered at ambient temperature (a, c) and at 100 K (b, d).

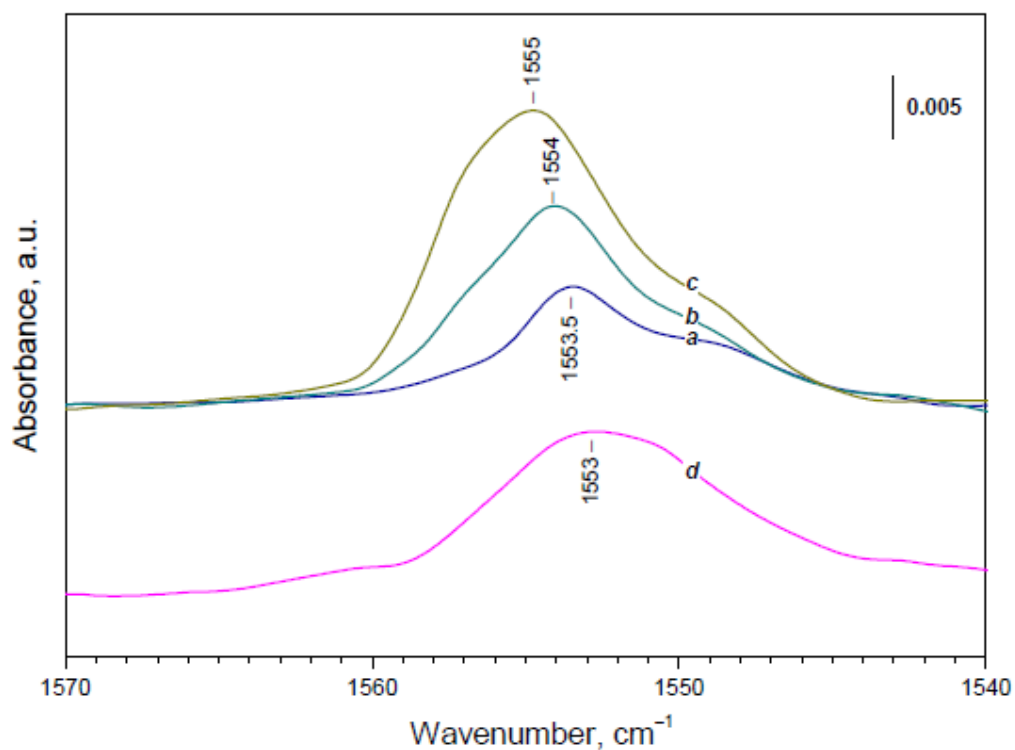

**Figure S5.** FTIR spectra of O<sub>2</sub> adsorbed at 100 K on CeO<sub>2</sub>-NC evacuated at 573 K (a), 673 K (b) and 773 K (c) and on reduced CeO<sub>2</sub>-NC evacuated at 773 K (d).

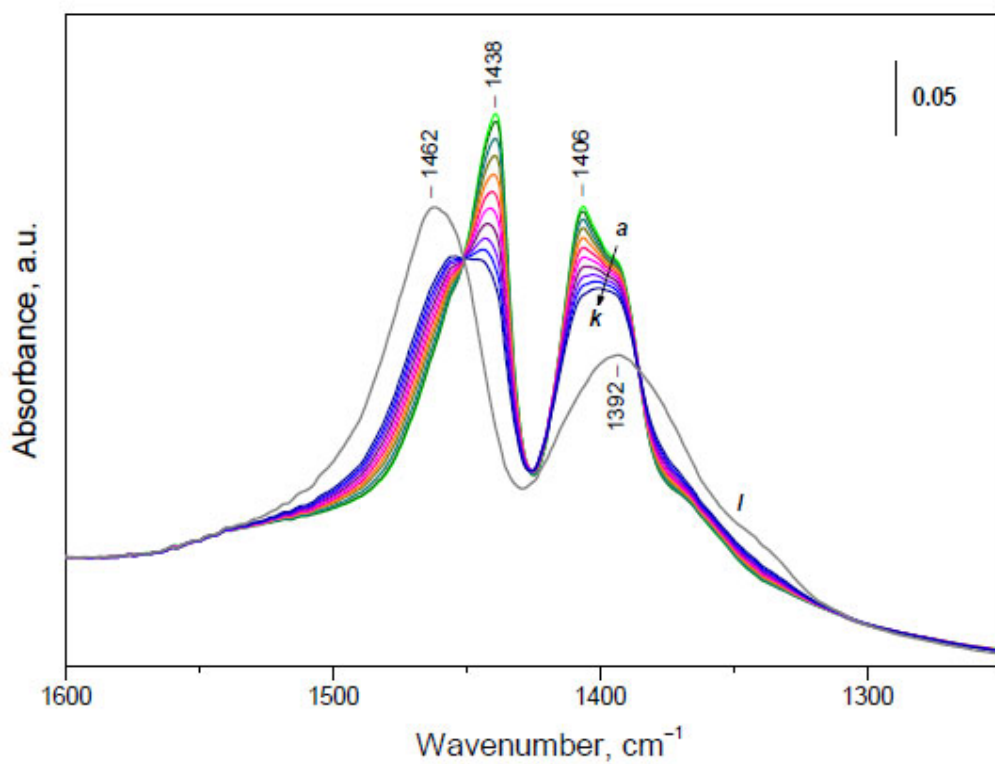

**Figure S6.** FTIR spectra of reduced CeO<sub>2</sub>-NP sample (carbonate region, 100 K) (a), after successive introduction of small doses of 18O<sub>2</sub> (b-k) and in the presence of 2 mbar 18O<sub>2</sub> (l).

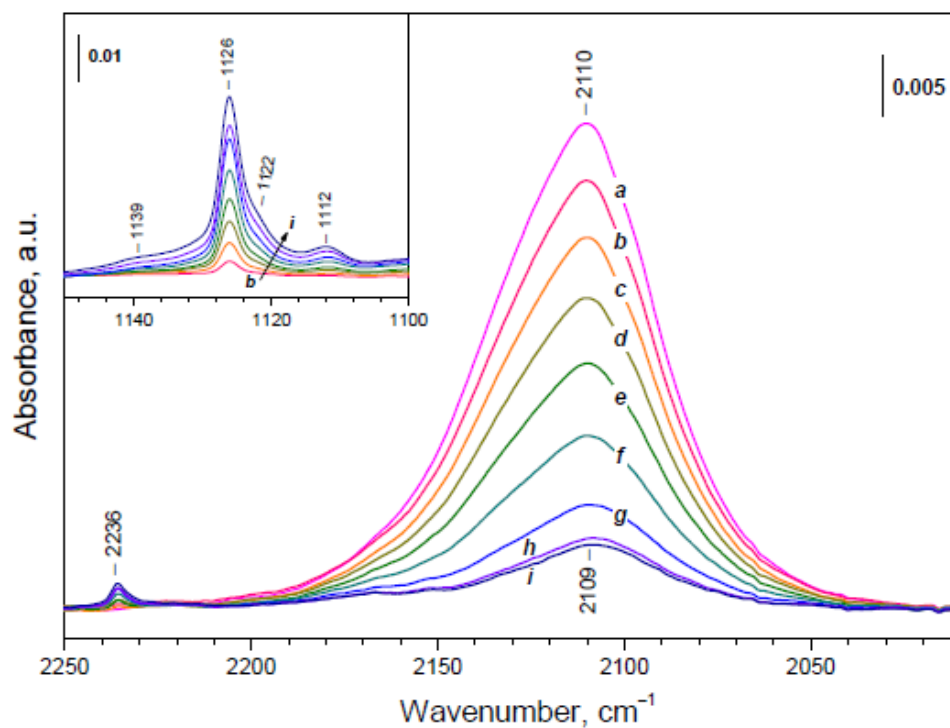

**Figure S7.** FTIR spectra of reduced  $\text{CeO}_2\text{-NC}$  (a), changes in the spectra after successive addition of small doses of oxygen (b-h) and in presence of 8 mbar  $\text{O}_2$ . The spectra are background corrected.

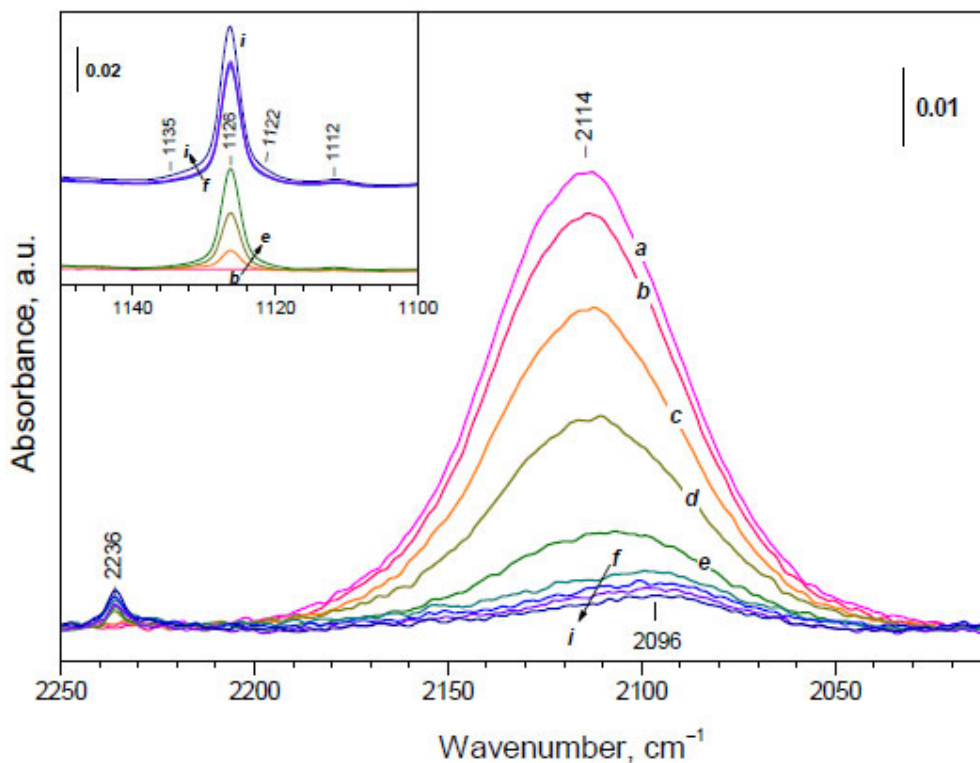

**Figure S8.** FTIR spectra of reduced  $\text{CeO}_2\text{-NR}$  (a), changes in the spectra after successive addition of small doses of oxygen (b-h) and in presence of 8 mbar  $\text{O}_2$ . The spectra in the inset are background corrected

**Table S1.** Consumption of H<sub>2</sub> (a.u.) during the TPR of the ceria samples below (surface reduction) and above 923 K (bulk reduction).

| Sample               | Area of 1-st TPR Peak<br>(T = 500 - 923 K) | Area of 2-nd TPR Peak<br>(T = 923 - 1373 K) <sup>a</sup> | Percentage of<br>the first peak | Surface area,<br>m <sup>2</sup> g <sup>-1</sup> |
|----------------------|--------------------------------------------|----------------------------------------------------------|---------------------------------|-------------------------------------------------|
| CeO <sub>2</sub> -NP | 7426                                       | 7998                                                     | 48.1                            | 140                                             |
| CeO <sub>2</sub> -NR | 5543                                       | 6898                                                     | 44.6                            | 110                                             |
| CeO <sub>2</sub> -NC | 2902                                       | 10840                                                    | 21.1                            | 27                                              |
